# Supplementary material
Source: PubMed Central journal article supplement (PMC1409732)
Supplement: 7600997s1.pdf [file 7600997s1.pdf]

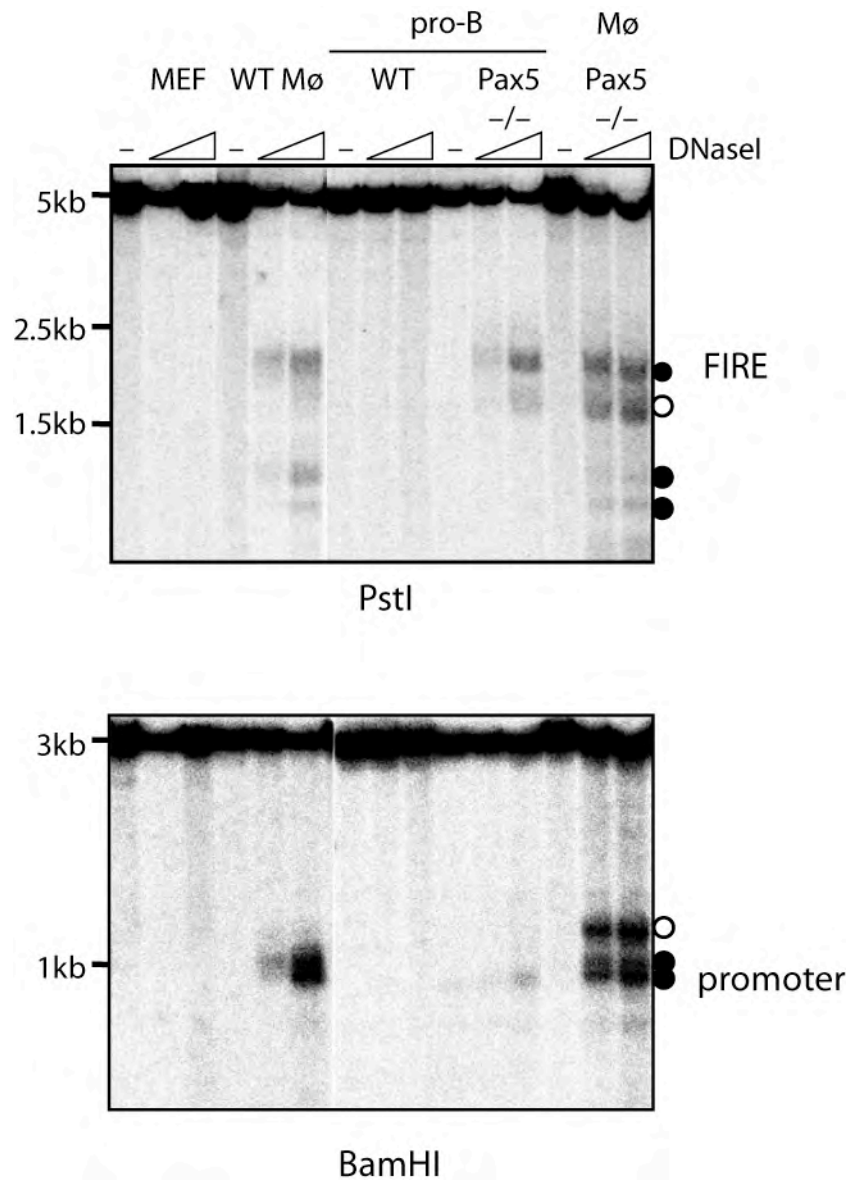

**Supplementary Figure 1:** The chromatin at cis-regulatory regions of *c-fms* is accessible in *Pax5*<sup>-/-</sup> progenitor cells and closed in wild-type pro-B cells. *c-fms* regulatory elements are DNaseI hypersensitive in *Pax5*<sup>-/-</sup> progenitor cells but not in wild-type pro-B cells. The indicated cells were treated with increasing amounts of DNaseI. Southern blot analysis was performed on PstI-digested (+443bp – +5662bp) genomic DNA to explore the intronic region (top) and by BamHI digestion (-2169bp – +848bp) for the promoter region (bottom). PvuII-BamHI fragment (+497bp – +848bp) was used for both analyses. DHSs present in macrophages are shown as closed circles and DHSs that were stronger in cells derived from *Pax5*<sup>-/-</sup> progenitor cells are shown as open circles to the right of each band. Only DHSs that were observed in at least two independent experiments were marked.
