# Supplementary material
Source: PubMed Central journal article supplement (PMC1409732)
Supplement: 7600997s2.pdf [file 7600997s2.pdf]

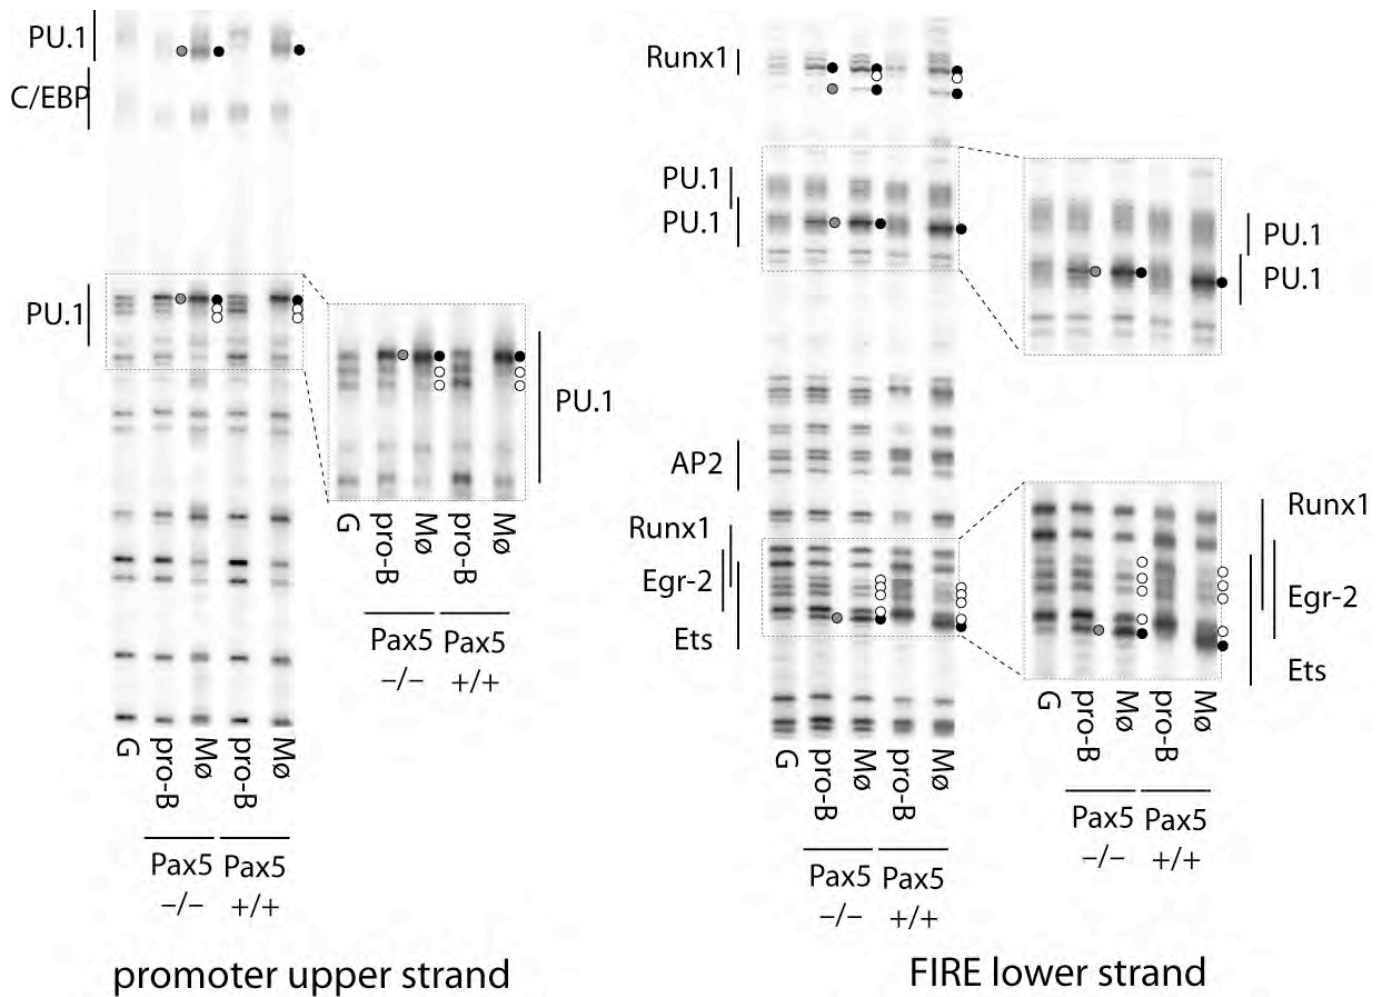

**Supplementary Figure 2:** Transcription factor binding sites at the *c-fms* promoter and FIRE are partially occupied in *Pax5*<sup>-/-</sup> progenitor cells. *In vivo* DMS footprinting analysis with freshly purified pro-B cells. From left to right, DMS-treated naked DNA (G), freshly purified primary pro-B cells and bone marrow-derived macrophages from *Pax5*<sup>-/-</sup> and *RAG2*<sup>-/-</sup> mice respectively. Transcription factor binding sites are indicated as a line. Black circles indicate hypermethylated G residues, open circles are hypomethylated G residues compared with DMS-treated naked DNA (G). Grey circles indicate weak footprints seen in *Pax5*<sup>-/-</sup> progenitor cells. An enlarged view of each factor-binding site is shown to the right.
