# Supplementary material
Source: PubMed Central journal article supplement (PMC1409732)
Supplement: 7600997s3.pdf [file 7600997s3.pdf]

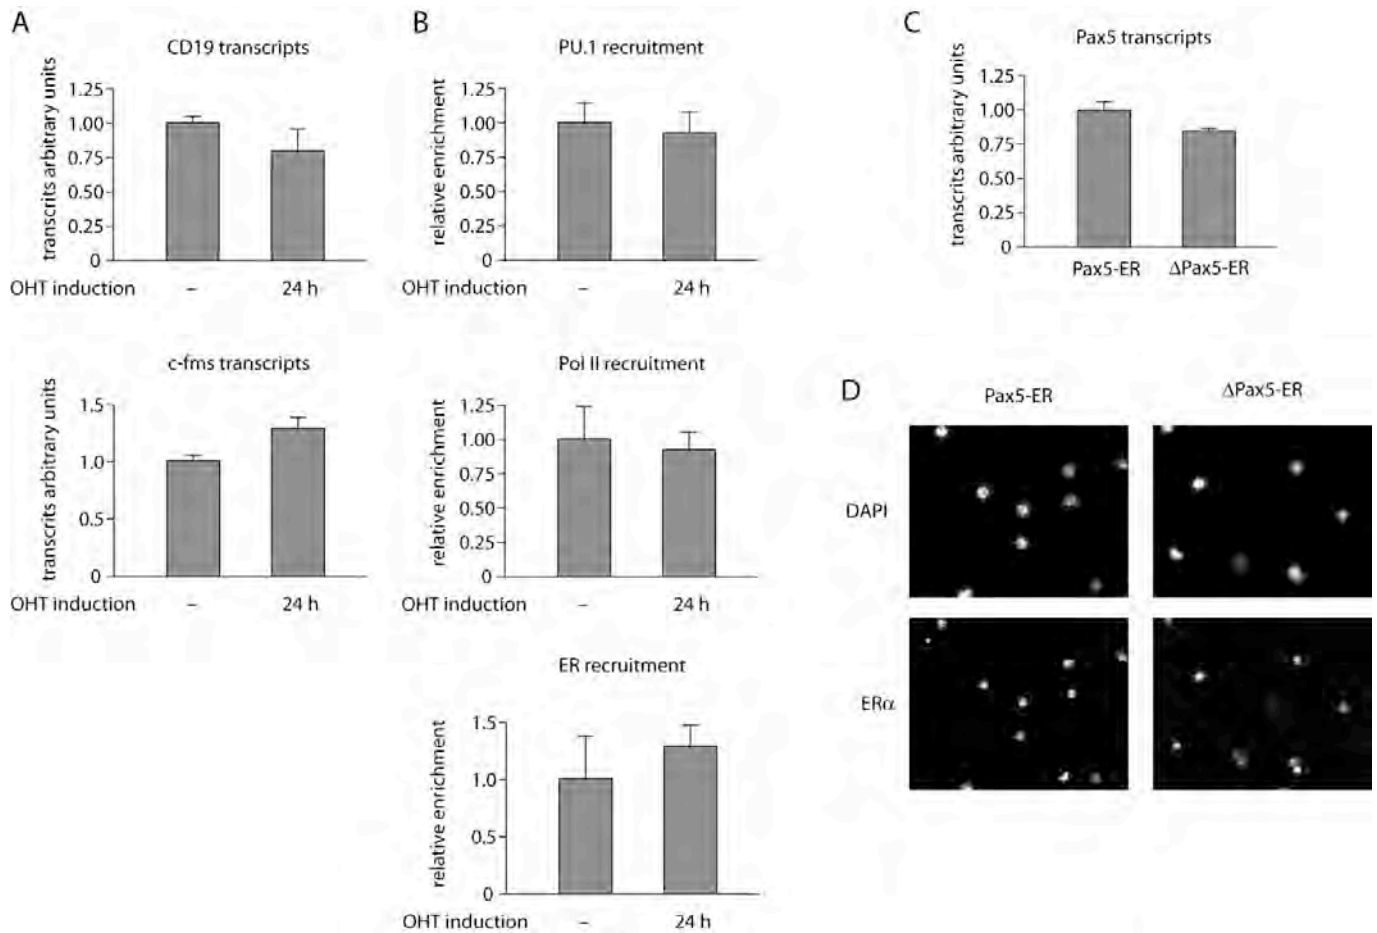

**Supplementary Figure 3:** Pax5-ER fusion protein deleted paired domain ( $\Delta$ Pax5-ER (Nutt et al. 1998)) is not recruited to c-fms promoter and cannot alter PU.1 and PolIII binding at this region. Before or after OHT induction for 24 hours, the expression of c-fms and CD19 transcripts (A), recruitment of Pax5-ER/ $\Delta$ Pax5-ER, PU.1, and PolIII (B) were analysed. The value obtained in cells without OHT induction was set as one. RT-PCR analysis confirmed that Pax5-ER cells and  $\Delta$ Pax5-ER cells express similar level of Pax5 transcripts (C). Pax5-ER and  $\Delta$ Pax5-ER proteins localized into nuclei after OHT induction (D) was confirmed by immuno-staining with human ER $\alpha$  antibody.
