# Supplementary material
Source: PubMed Central journal article supplement (PMC1409732)
Supplement: 7600997s4.pdf [file 7600997s4.pdf]

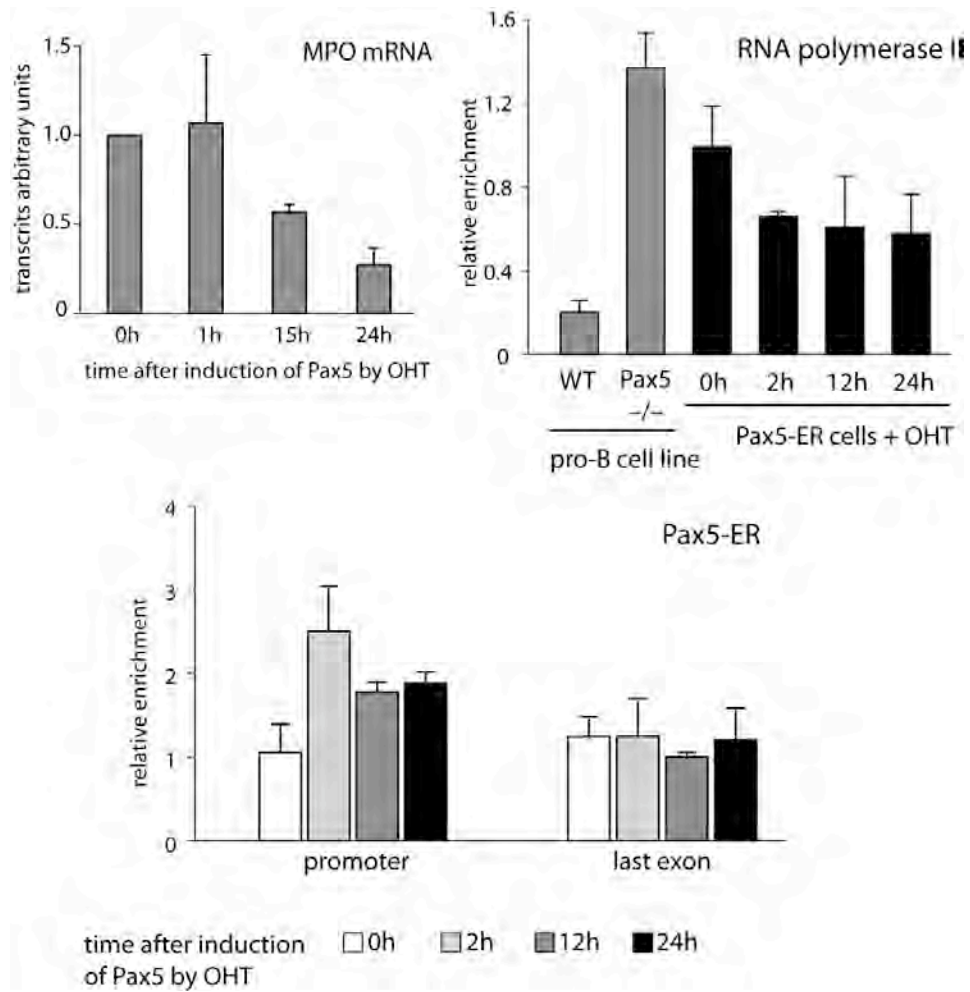

**Supplementary Figure 4:** The Pax5-ER is recruited to the *mpo* promoter after OHT induction and the loss of RNA polymerase II occurs simultaneously. Enrichment of *mpo* promoter sequences was measured on the same sample prepared for Figure 2A and C.
