# Supplementary material
Source: PubMed Central journal article supplement (PMC1409732)
Supplement: 7600997s5.pdf [file 7600997s5.pdf]

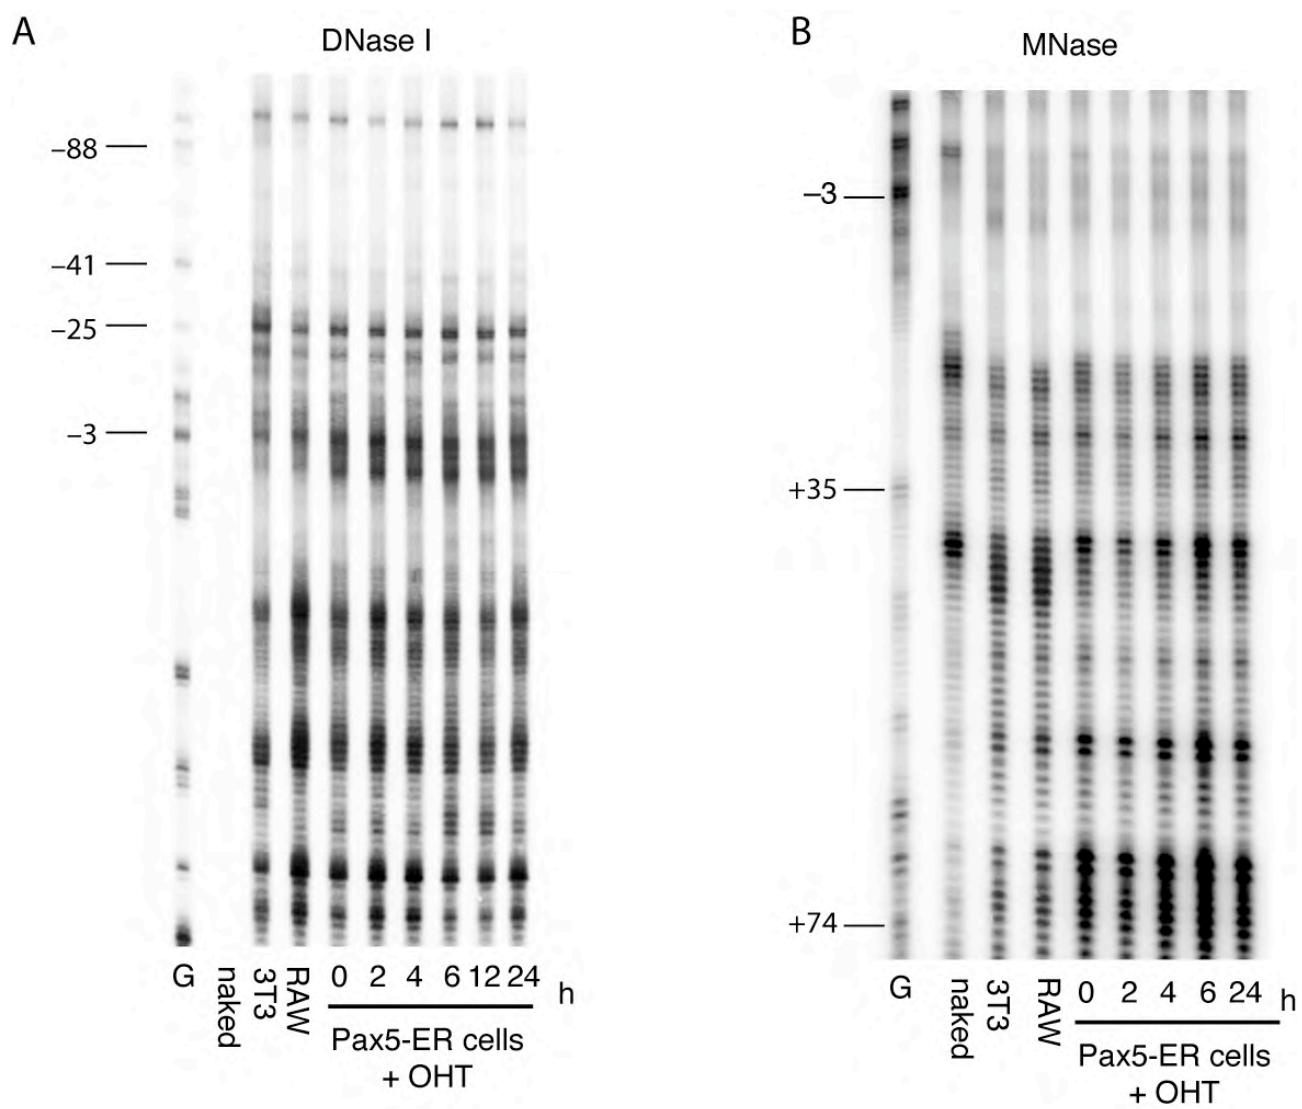

**Supplementary Figure 5:** Double-strand specific LM-PCR on DNaseI (A) or MNase (B) treated materials examining a ribosomal RNA gene to control equal digestion of the samples shown in Figure 3A and Figure 4.
