# Supplementary material
Source: PubMed Central journal article supplement (PMC1409732)
Supplement: 7600997s6.pdf [file 7600997s6.pdf]

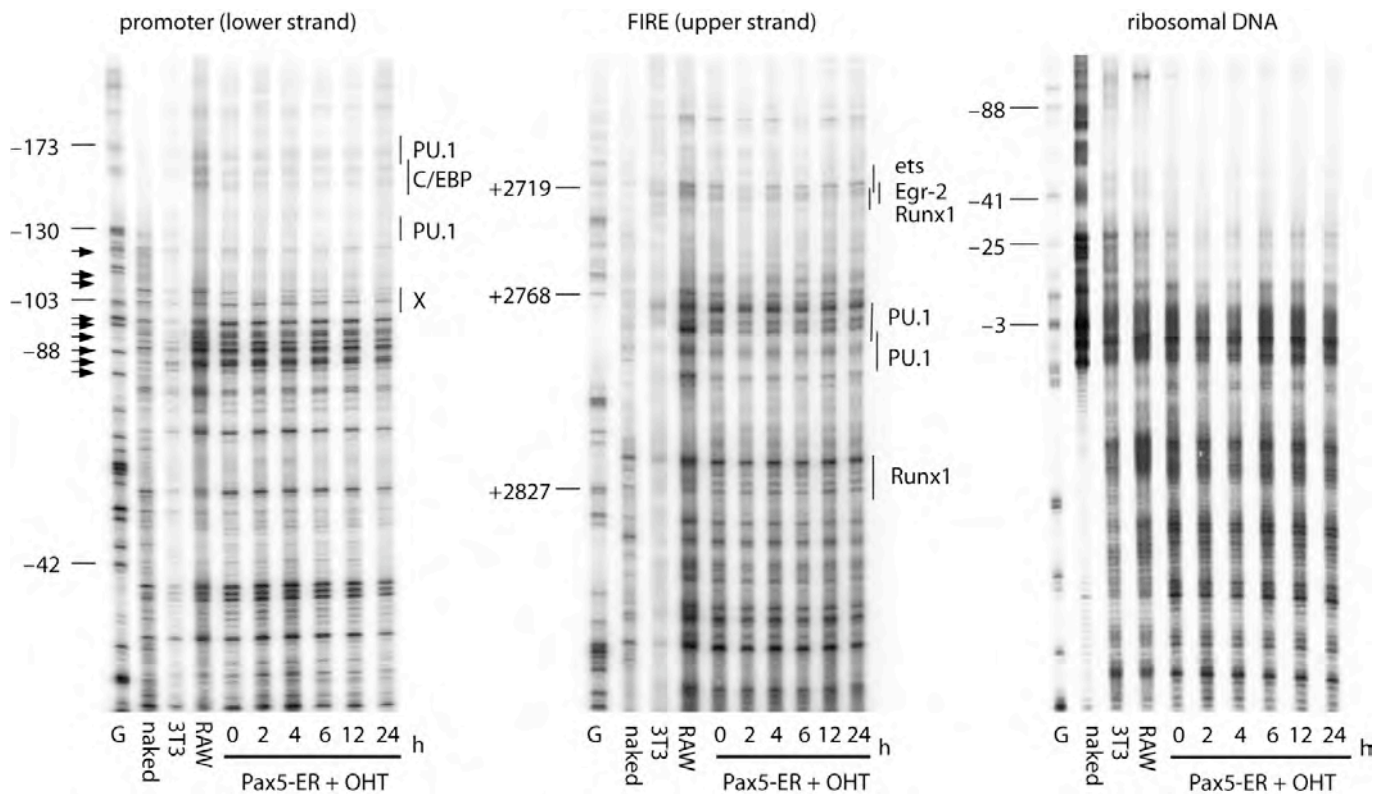

**Supplementary Figure 6:** General DNaseI accessibility as measured by single-strand lesions specific LM-PCR at the *c-fms* promoter and the FIRE enhancer is high in *Pax5*<sup>-/-</sup> cells and is unchanged after Pax5 induction. From the left to the right DMS treated naked DNA (G), DNaseI treated naked DNA, DNA prepared from DNaseI treated 3T3 cells, RAW 264 cells and from Pax5-ER cells induced with OHT for the indicated time points. Right panel: ribosomal RNA promoter (digestion control). Horizontal arrows indicate the position of transcription start sites.
