# Supplementary material
Source: PubMed Central journal article supplement (PMC1409732)
Supplement: 7600997s7.pdf [file 7600997s7.pdf]

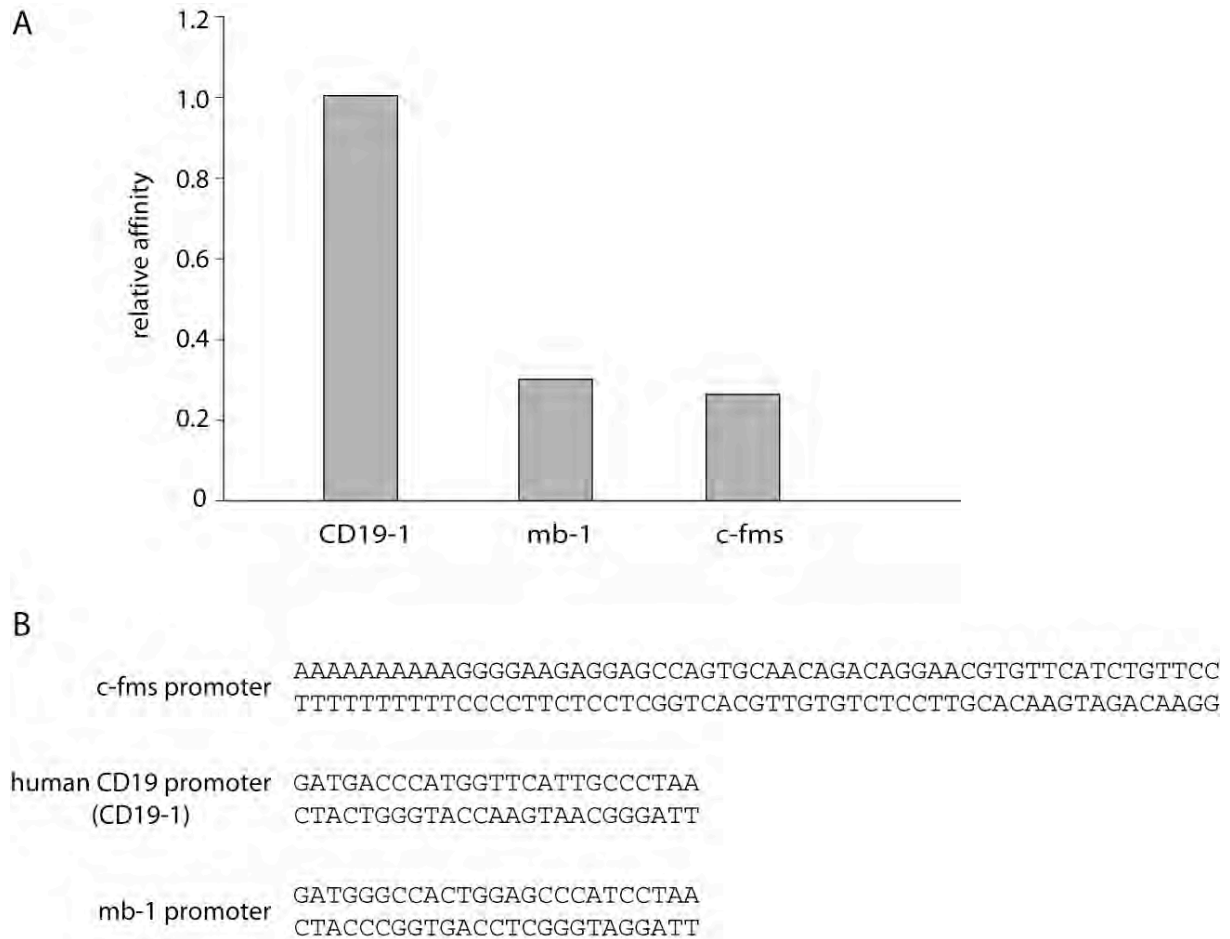

**Supplementary Figure 7:** Pax5 binds to the *c-fms* promoter site with the same affinity as to the mouse *mb-1* promoter. (A) EMSA with oligonucleotides (human CD19-1, mouse *mb-1* and mouse *c-fms*) with increasing amount of Pax5 DBD was performed. Relative affinity of Pax5 to each promoter was represented as a reciprocal number of the amount of Pax5 protein which gives 50% binding. The value obtained with CD19-1 probe was set as one. (B) DNA sequence of each oligonucleotide used in (A).
