# Supplementary material
Source: PubMed Central journal article supplement (PMC1409732)
Supplement: 7600997s8.pdf [file 7600997s8.pdf]

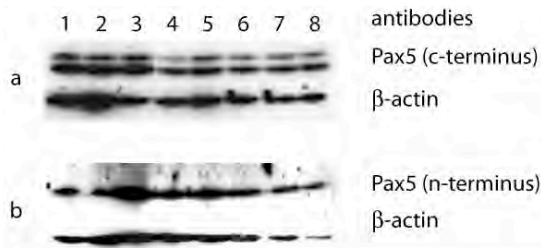

| reporter                                  | effector                             |
|-------------------------------------------|--------------------------------------|
| 1 promoter less (pGL2)                    | pKW2T-Pax5 (a) or pKW2T-Pax5 DBD (b) |
| 2 SV40 promoter                           | pKW2T-Pax5 (a) or pKW2T-Pax5 DBD (b) |
| 3 c-fms promoter (-425)                   | pKW2T-Pax5 (a) or pKW2T-Pax5 DBD (b) |
| 4 c-fms promoter (-425) + FIRE-1kb + FIRE | pKW2T-Pax5 (a) or pKW2T-Pax5 DBD (b) |
| 5 c-fms promoter (-425) + FIRE            | pKW2T-Pax5 (a) or pKW2T-Pax5 DBD (b) |
| 6 c-fms promoter (-425) + FIRE-1kb        | pKW2T-Pax5 (a) or pKW2T-Pax5 DBD (b) |
| 7 SV40 promoter + FIRE                    | pKW2T-Pax5 (a) or pKW2T-Pax5 DBD (b) |
| 8 SV40 promoter + FIRE-1kb                | pKW2T-Pax5 (a) or pKW2T-Pax5 DBD (b) |

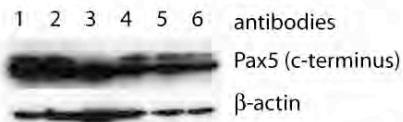

| reporter                | effector   |
|-------------------------|------------|
| 1 promoter less (pGL2)  | pKW2T-Pax5 |
| 2 SV40 promoter         | pKW2T-Pax5 |
| 3 c-fms promoter (-201) | pKW2T-Pax5 |
| 4 c-fms promoter (-180) | pKW2T-Pax5 |
| 5 c-fms promoter (-135) | pKW2T-Pax5 |
| 6 c-fms promoter (-100) | pKW2T-Pax5 |

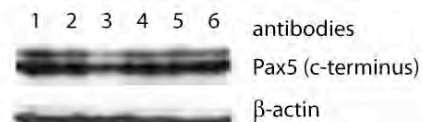

| reporter                          | effector   |
|-----------------------------------|------------|
| 1 promoter less (pGL2)            | pKW2T-Pax5 |
| 2 c-fms promoter (-135) wild type | pKW2T-Pax5 |
| 3 c-fms promoter (-135) mutant 1  | pKW2T-Pax5 |
| 4 c-fms promoter (-135) mutant 4  | pKW2T-Pax5 |
| 5 c-fms promoter (-135) mutant 5  | pKW2T-Pax5 |
| 6 c-fms promoter (-135) mutant 10 | pKW2T-Pax5 |

**Supplementary Figure 8:** Similar levels of expression of transfected Pax5 (full length and DBD) were confirmed by Western blotting. Transfected cells were lysed in sample buffer and the Pax5 protein was detected by Western blot with either Pax5 C-terminus antibody (for full length Pax5) or Pax5 N-terminus antibody (for DBD).  $\beta$ -actin protein was used as loading control.
